# Supplementary material for: Fast iodide-SAD phasing for high-throughput membrane protein structure determination
Source: PubMed Central journal article supplement — Sci Adv. 2017 May 12;3(5):e1602952. doi: 10.1126/sciadv.1602952 (PMC5429034; doi:10.1126/sciadv.1602952), 2017-05-12
Supplement: 1602952_SM.pdf [file 1602952_SM.pdf]

## Supplementary Materials for

### **Fast iodide-SAD phasing for high-throughput membrane protein structure determination**

Igor Melnikov, Vitaly Polovinkin, Kirill Kovalev, Ivan Gushchin, Mikhail Shevtsov, Vitaly Shevchenko, Alexey Mishin, Alexey Alekseev, Francisco Rodriguez-Valera, Valentin Borshchevskiy, Vadim Cherezov, Gordon A. Leonard, Valentin Gordeliy, Alexander Popov

Published 12 May 2017, *Sci. Adv.* **3**, e1602952 (2017)

DOI: 10.1126/sciadv.1602952

#### **This PDF file includes:**

- fig. S1. Comparison of peaks in anomalous difference Fourier maps calculated from individual data sets in I-SAD experiment.
- fig. S2. The distribution of positively charged and aromatic residues in the crystal structures obtained in I-SAD experiment.
- fig. S3. The bound iodide ions and their environment.

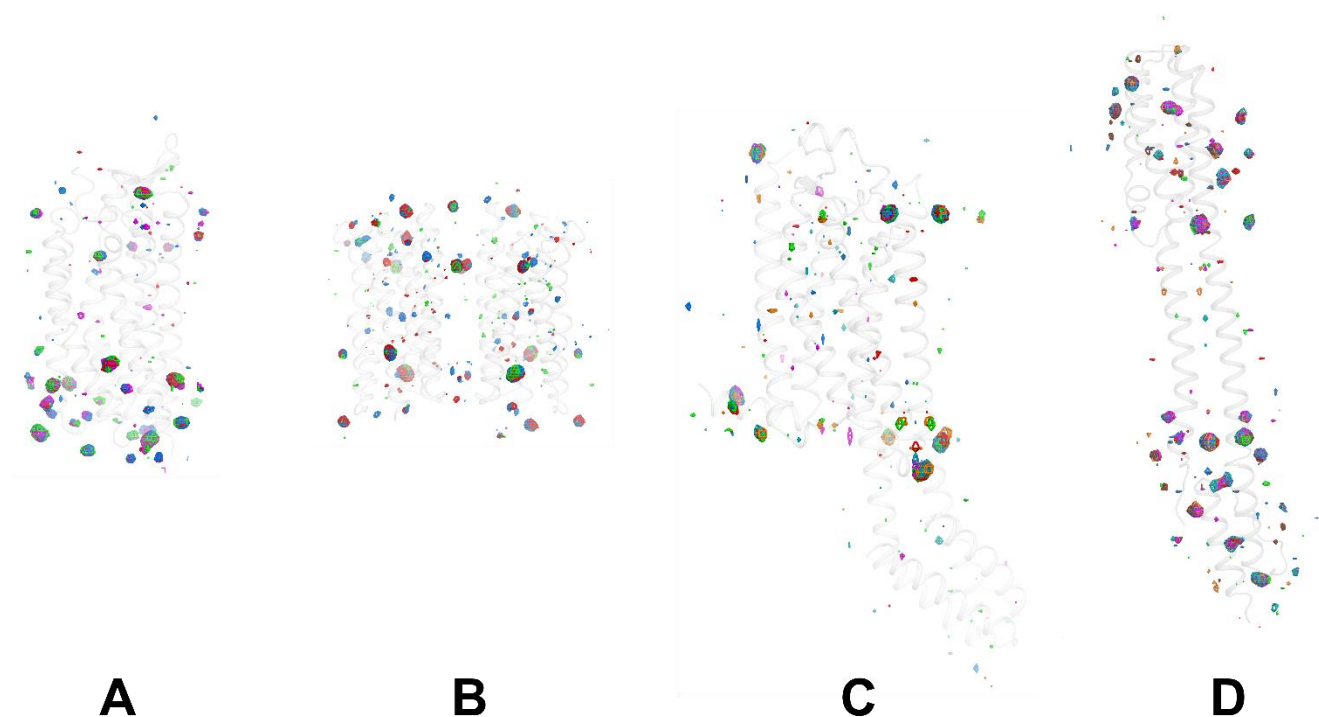

**fig. S1. Comparison of peaks in anomalous difference Fourier maps calculated from individual data sets in I-SAD experiment.** Only the regions close to the proteins are shown and the maps are contoured at the 3.5 x r.m.s. (root mean square) level. Each individual data set (see Table 1) is represented by its individual color (red, green, marine, teal, orange, magenta, firebrick, skyblue) for each of the structures displayed: **(A)** KR2, **(B)** MACR, **(C)** A<sub>2A</sub>AR-BRIL-ΔC, **(D)** NarQ.

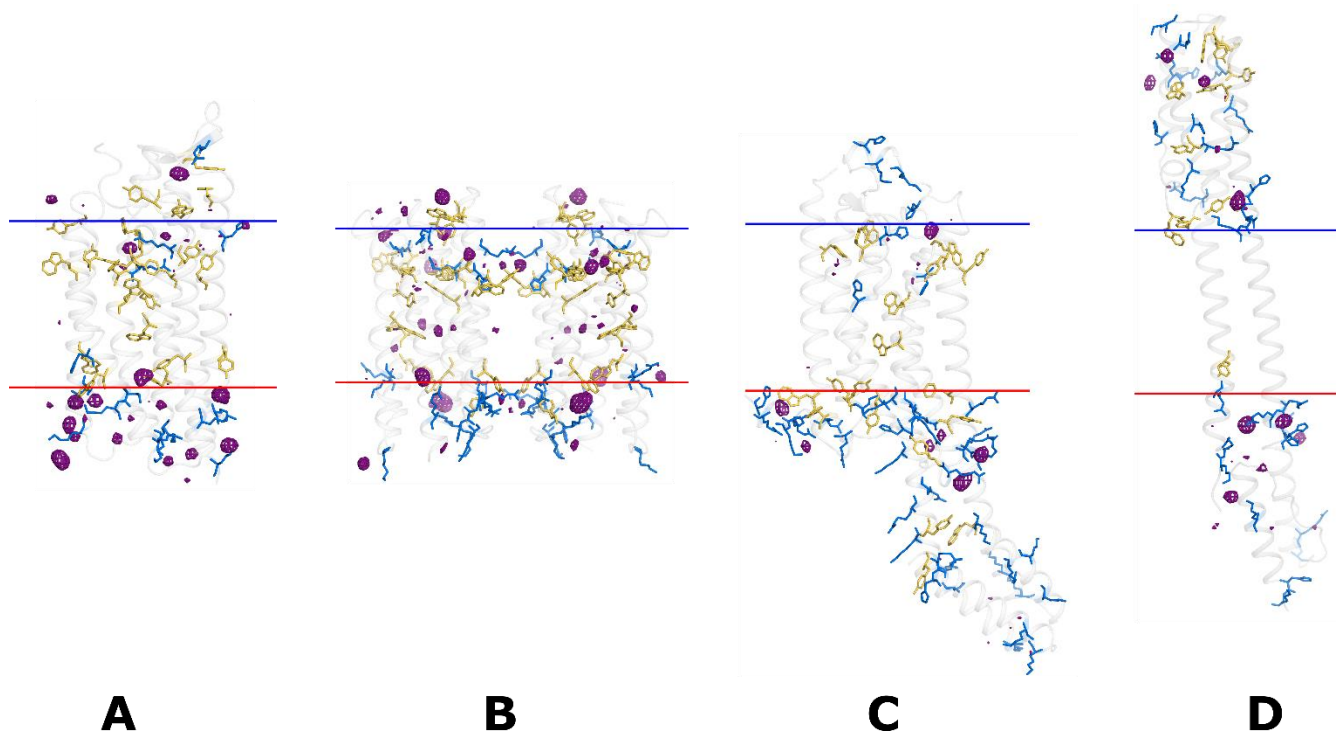

**fig. S2. The distribution of positively charged and aromatic residues in the crystal structures obtained in I-SAD experiment.** Positively charged protein residues (Arg, Lys, His) are represented as blue sticks, aromatic residues (Trp, Tyr) are represented as yellow sticks. The anomalous difference Fourier maps from I-SAD experiment (purple chicken wire, calculated from highest-resolution I-SAD data sets for each target (Table 1), contoured at 3.5 x r.m.s. level) are shown superposed on the structures of KR2 (**A**), MACR (**B**), A<sub>2A</sub>AR-BRIL-ΔC (**C**), NarQ (**D**). The blue and red lines represent outer and inner lipidic membrane surfaces, respectively.

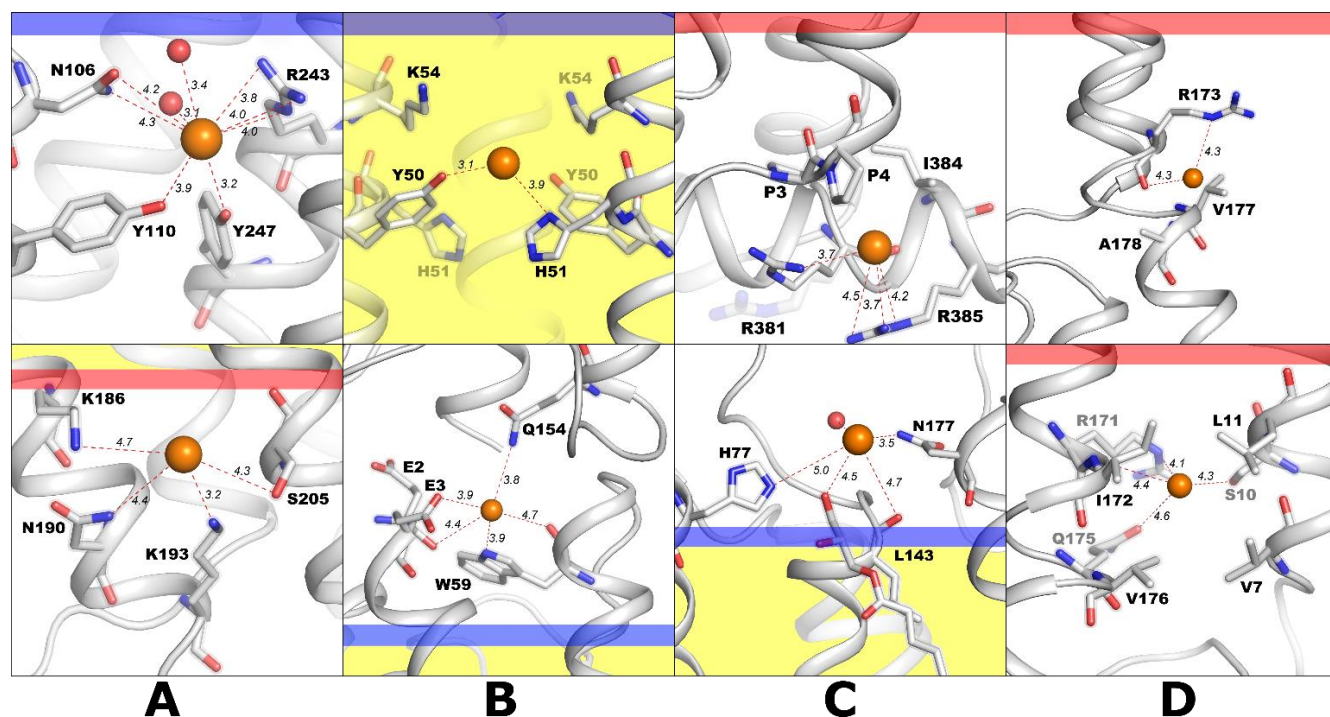

**fig. S3. The bound iodide ions and their environment.** Two figures (top and bottom) illustrating iodide environment at different binding sites are shown for each of the proteins investigated: (A) KR2, (B) MACR, (C) A<sub>2A</sub>AR-BRIL-ΔC, (D) NarQ. The blue and red stripes represent outer and inner lipidic membrane surfaces respectively with the hydrophobic region of the lipidic membrane represented in yellow. Iodide ions are shown as orange spheres. Water molecules are shown as red spheres.
